# Supplementary material
Source: publisher figshare collection journal article supplement (https://plos.figshare.com/articles/dataset/_/116016)
Supplement: Supplementary file [file 1]

**Supplementary Table S3:** Number of outbreaks by driver, used in Figure 2.

| <b>Rank</b> | <b>Driver</b>                                  | <b>Subdriver Count</b> | <b>Total Count</b> | <b>Percent</b> |
|-------------|------------------------------------------------|------------------------|--------------------|----------------|
| 1           | <i>breakdown of public health measures</i>     |                        | 157                | 0.40           |
|             | (sanitation & hygiene)                         | 93                     |                    |                |
|             | (immunization coverage)                        | 48                     |                    |                |
|             | (vector control)                               | 16                     |                    |                |
| 2           | <i>food &amp; agriculture industry changes</i> |                        | 51                 | 0.13           |
| 3           | <i>climate &amp; weather</i>                   |                        | 42                 | 0.11           |
| 4           | <i>international travel &amp; commerce</i>     |                        | 37                 | 0.09           |
| 5           | <i>unspecified</i>                             |                        | 36                 | 0.09           |
| 6           | <i>human demographics &amp; behavior</i>       |                        | 32                 | 0.08           |
| 7           | <i>war &amp; famine</i>                        |                        | 20                 | 0.05           |
| 8           | <i>bushmeat</i>                                |                        | 12                 | 0.03           |
| 9           | <i>other</i>                                   |                        | 10                 | 0.03           |
|             | (human susceptibility to infection)            | 5                      |                    |                |
|             | (land use changes)                             | 4                      |                    |                |
|             | (medical industry changes)                     | 1                      |                    |                |
|             |                                                | <b>TOTAL EVENTS</b>    | <b>397</b>         |                |
