# Supplementary material
Source: publisher figshare collection journal article supplement (https://plos.figshare.com/articles/dataset/_/116016)
Supplement: Supplementary file [file 1]

**Supplementary Table S2:** Summary of outbreak information extracted from the WHO Disease Outbreak News Reports by disease, country and date, with corresponding driver classification

| <b>Disease</b> | <b>Country</b>           | <b>Date</b>       | <b>General Driver</b>               | <b>Driver Details</b> | <b>Link</b>                                                                                                             |
|----------------|--------------------------|-------------------|-------------------------------------|-----------------------|-------------------------------------------------------------------------------------------------------------------------|
| Malaria        | Burundi                  | 25 June 1999      | breakdown of public health measures | vector control        | <a href="http://www.who.int/csr/don/1999_06_25/en/">http://www.who.int/csr/don/1999_06_25/en/</a>                       |
| Measles        | Ireland                  | 09 August 2000    | breakdown of public health measures | immunization coverage | <a href="http://www.who.int/csr/don/2000_08_09/en/">http://www.who.int/csr/don/2000_08_09/en/</a>                       |
| Yellow Fever   | Benin                    | 02 October 1996   | breakdown of public health measures | vector control        | <a href="http://www.who.int/csr/don/1996_10_02/en/">http://www.who.int/csr/don/1996_10_02/en/</a>                       |
| Measles        | South Korea              | 09 February 2001  | breakdown of public health measures | immunization coverage | <a href="http://www.who.int/csr/don/2001_02_09/en/">http://www.who.int/csr/don/2001_02_09/en/</a>                       |
| Yellow Fever   | Brazil                   | 05 February 2008  | breakdown of public health measures | immunization coverage | <a href="http://www.who.int/csr/don/2008_02_07/en/">http://www.who.int/csr/don/2008_02_07/en/</a>                       |
| Poliomyelitis  | Albania                  | 18 September 1996 | breakdown of public health measures | immunization coverage | <a href="http://www.who.int/csr/don/1996_09_18/en/">http://www.who.int/csr/don/1996_09_18/en/</a>                       |
| Yellow Fever   | Bolivia                  | 11 February 1999  | breakdown of public health measures | vector control        | <a href="http://www.who.int/csr/don/1999_02_11/en/">http://www.who.int/csr/don/1999_02_11/en/</a>                       |
| Yellow Fever   | Brazil                   | 26 August 1998    | breakdown of public health measures | vector control        | <a href="http://www.who.int/csr/don/1998_08_26/en/">http://www.who.int/csr/don/1998_08_26/en/</a>                       |
| Yellow Fever   | Burkina Faso             | 22 December 1998  | breakdown of public health measures | vector control        | <a href="http://www.who.int/csr/don/1998_12_22a/en/">http://www.who.int/csr/don/1998_12_22a/en/</a>                     |
| Yellow Fever   | Colombia                 | 18 May 1999       | breakdown of public health measures | vector control        | <a href="http://www.who.int/csr/don/1999_05_18a/en/">http://www.who.int/csr/don/1999_05_18a/en/</a>                     |
| Yellow Fever   | Cote d'Ivoire            | 04 September 2001 | breakdown of public health measures | vector control        | <a href="http://www.who.int/csr/don/2001_09_04/en/">http://www.who.int/csr/don/2001_09_04/en/</a>                       |
| Yellow Fever   | Cote d'Ivoire            | 31 May 2001       | breakdown of public health measures | vector control        | <a href="http://www.who.int/csr/don/2001_05_31/en/">http://www.who.int/csr/don/2001_05_31/en/</a>                       |
| Yellow Fever   | Ghana                    | 05 December 1996  | breakdown of public health measures | vector control        | <a href="http://www.who.int/csr/don/1996_12_05/en/">http://www.who.int/csr/don/1996_12_05/en/</a>                       |
| Yellow Fever   | Guinea                   | 25 September 2001 | breakdown of public health measures | vector control        | <a href="http://www.who.int/csr/don/2001_09_25a/en/">http://www.who.int/csr/don/2001_09_25a/en/</a>                     |
| Yellow Fever   | Peru                     | 18 May 1999       | breakdown of public health measures | vector control        | <a href="http://www.who.int/csr/don/1999_05_18a/en/">http://www.who.int/csr/don/1999_05_18a/en/</a>                     |
| Yellow Fever   | Senegal                  | 21 January 2002   | breakdown of public health measures | vector control        | <a href="http://www.who.int/csr/don/2002_01_21/en/">http://www.who.int/csr/don/2002_01_21/en/</a>                       |
| Yellow Fever   | Sudan                    | 27 May 2003       | breakdown of public health measures | immunization coverage | <a href="http://www.who.int/csr/don/2003_05_27/en/">http://www.who.int/csr/don/2003_05_27/en/</a>                       |
| Poliomyelitis  | Somalia                  | 13 September 2005 | breakdown of public health measures | immunization coverage | <a href="http://www.who.int/csr/don/2005_09_13/en/">http://www.who.int/csr/don/2005_09_13/en/</a>                       |
| Measles        | Nigeria                  | 17 March 2005     | breakdown of public health measures | immunization coverage | <a href="http://www.who.int/csr/don/2005_03_17/en/">http://www.who.int/csr/don/2005_03_17/en/</a>                       |
| Yellow Fever   | Burkina Faso             | 03 November 2008  | breakdown of public health measures | immunization coverage | <a href="http://www.who.int/csr/don/2008_11_03/en/">http://www.who.int/csr/don/2008_11_03/en/</a>                       |
| Yellow Fever   | Burkina Faso             | 24 November 2004  | breakdown of public health measures | immunization coverage | <a href="http://www.who.int/csr/don/2004_11_24/en/">http://www.who.int/csr/don/2004_11_24/en/</a>                       |
| Yellow Fever   | Central African Republic | 01 December 2009  | breakdown of public health measures | immunization coverage | <a href="http://www.who.int/csr/don/2009_12_01/en/">http://www.who.int/csr/don/2009_12_01/en/</a>                       |
| Yellow Fever   | Central African Republic | 20 May 2008       | breakdown of public health measures | immunization coverage | <a href="http://www.who.int/csr/don/2008_05_20/en/">http://www.who.int/csr/don/2008_05_20/en/</a>                       |
| Yellow Fever   | Cote d'Ivoire            | 08 August 2008    | breakdown of public health measures | immunization coverage | <a href="http://www.who.int/csr/don/2008_08_08/en/index.html">http://www.who.int/csr/don/2008_08_08/en/index.html</a>   |
| Yellow Fever   | Cote d'Ivoire            | 19 October 2006   | breakdown of public health measures | immunization coverage | <a href="http://www.who.int/csr/don/2006_10_19a/en/">http://www.who.int/csr/don/2006_10_19a/en/</a>                     |
| Yellow Fever   | Guinea                   | 02 November 2005  | breakdown of public health measures | immunization coverage | <a href="http://www.who.int/csr/don/2005_11_02/en/">http://www.who.int/csr/don/2005_11_02/en/</a>                       |
| Yellow Fever   | Guinea                   | 14 January 2009   | breakdown of public health measures | immunization coverage | <a href="http://www.who.int/csr/don/2009_01_14/en/">http://www.who.int/csr/don/2009_01_14/en/</a>                       |
| Yellow Fever   | Guinea                   | 29 September 2008 | breakdown of public health measures | immunization coverage | <a href="http://www.who.int/csr/don/2008_09_29/en/">http://www.who.int/csr/don/2008_09_29/en/</a>                       |
| Yellow Fever   | Liberia                  | 18 April 2008     | breakdown of public health measures | immunization coverage | <a href="http://www.who.int/csr/don/2008_04_18/en/">http://www.who.int/csr/don/2008_04_18/en/</a>                       |
| Yellow Fever   | Mali                     | 03 November 2005  | breakdown of public health measures | immunization coverage | <a href="http://www.who.int/csr/don/2005_11_03/en/">http://www.who.int/csr/don/2005_11_03/en/</a>                       |
| Yellow Fever   | Paraguay                 | 20 February 2008  | breakdown of public health measures | immunization coverage | <a href="http://www.who.int/csr/don/2008_02_20a/en/">http://www.who.int/csr/don/2008_02_20a/en/</a>                     |
| Yellow Fever   | Senegal                  | 20 October 2005   | breakdown of public health measures | immunization coverage | <a href="http://www.who.int/csr/don/2005_10_20/en/">http://www.who.int/csr/don/2005_10_20/en/</a>                       |
| Yellow Fever   | Sierra Leone             | 06 January 2009   | breakdown of public health measures | immunization coverage | <a href="http://www.who.int/csr/don/2009_01_06a/en/index.html">http://www.who.int/csr/don/2009_01_06a/en/index.html</a> |
| Yellow Fever   | Sudan                    | 21 November 2005  | breakdown of public health measures | immunization coverage | <a href="http://www.who.int/csr/don/2005_11_21/en/">http://www.who.int/csr/don/2005_11_21/en/</a>                       |
| Yellow Fever   | Togo                     | 19 December 2006  | breakdown of public health measures | immunization coverage | <a href="http://www.who.int/csr/don/2006_12_19/en/">http://www.who.int/csr/don/2006_12_19/en/</a>                       |
|                | Nigeria; Benin; Niger    |                   |                                     |                       | <a href="http://www.who.int/csr/don/2008_06_18/en/">http://www.who.int/csr/don/2008_06_18/en/</a>                       |
| Poliomyelitis  | (West/Central Africa)    | 18 June 2008      | breakdown of public health measures | immunization coverage |                                                                                                                         |
| Measles        | Guadeloupe               | 17 January 1997   | breakdown of public health measures | immunization coverage | <a href="http://www.who.int/csr/don/1997_01_17a/en/">http://www.who.int/csr/don/1997_01_17a/en/</a>                     |
| Meningitis     | Central African Republic | 16 February 2000  | breakdown of public health measures | immunization coverage | <a href="http://www.who.int/csr/don/2000_02_16/en/">http://www.who.int/csr/don/2000_02_16/en/</a>                       |
| Meningitis     | DR Congo                 | 10 October 2001   | breakdown of public health measures | immunization coverage | <a href="http://www.who.int/csr/don/2001_10_10b/en/index.html">http://www.who.int/csr/don/2001_10_10b/en/index.html</a> |
| Meningitis     | Ethiopia                 | 17 March 2000     | breakdown of public health measures | immunization coverage | <a href="http://www.who.int/csr/don/2000_03_17/en/">http://www.who.int/csr/don/2000_03_17/en/</a>                       |
| Meningitis     | Rwanda                   | 20 October 1999   | breakdown of public health measures | immunization coverage | <a href="http://www.who.int/csr/don/1999_10_20/en/">http://www.who.int/csr/don/1999_10_20/en/</a>                       |
| Yellow Fever   | Brazil                   | 17 January 2003   | breakdown of public health measures | immunization coverage | <a href="http://www.who.int/csr/don/2003_01_17/en/">http://www.who.int/csr/don/2003_01_17/en/</a>                       |
| Yellow Fever   | Brazil                   | 17 March 1999     | breakdown of public health measures | immunization coverage | <a href="http://www.who.int/csr/don/1999_03_17b/en/">http://www.who.int/csr/don/1999_03_17b/en/</a>                     |

| <b>Disease</b> | <b>Country</b>  | <b>Date</b>       | <b>General Driver</b>               | <b>Driver Details</b> | <b>Link</b>                                                                                                             |
|----------------|-----------------|-------------------|-------------------------------------|-----------------------|-------------------------------------------------------------------------------------------------------------------------|
| Yellow Fever   | Brazil          | 28 February 2001  | breakdown of public health measures | immunization coverage | <a href="http://www.who.int/csr/don/2001_02_28a/en/">http://www.who.int/csr/don/2001_02_28a/en/</a>                     |
| Yellow Fever   | Burkina Faso    | 10 October 2003   | breakdown of public health measures | immunization coverage | <a href="http://www.who.int/csr/don/2003_10_10/en/">http://www.who.int/csr/don/2003_10_10/en/</a>                       |
| Yellow Fever   | Burkina Faso    | 11 May 2004       | breakdown of public health measures | immunization coverage | <a href="http://www.who.int/csr/don/2004_05_11/en/">http://www.who.int/csr/don/2004_05_11/en/</a>                       |
| Yellow Fever   | Guinea          | 03 February 2003  | breakdown of public health measures | immunization coverage | <a href="http://www.who.int/csr/don/2003_02_03/en/">http://www.who.int/csr/don/2003_02_03/en/</a>                       |
| Yellow Fever   | Guinea          | 07 January 2005   | breakdown of public health measures | immunization coverage | <a href="http://www.who.int/csr/don/2005_01_07/en/index.html">http://www.who.int/csr/don/2005_01_07/en/index.html</a>   |
| Yellow Fever   | Guinea          | 29 December 2000  | breakdown of public health measures | immunization coverage | <a href="http://www.who.int/csr/don/2000_12_29/en/">http://www.who.int/csr/don/2000_12_29/en/</a>                       |
| Yellow Fever   | Guinea          | 31 August 2005    | breakdown of public health measures | immunization coverage | <a href="http://www.who.int/csr/don/2005_08_31/en/">http://www.who.int/csr/don/2005_08_31/en/</a>                       |
| Yellow Fever   | Liberia         | 23 August 2001    | breakdown of public health measures | immunization coverage | <a href="http://www.who.int/csr/don/2001_08_23/en/">http://www.who.int/csr/don/2001_08_23/en/</a>                       |
| Yellow Fever   | Liberia         | 24 August 2000    | breakdown of public health measures | immunization coverage | <a href="http://www.who.int/csr/don/2000_08_24b/en/">http://www.who.int/csr/don/2000_08_24b/en/</a>                     |
| Yellow Fever   | Nigeria         | 19 May 2000       | breakdown of public health measures | immunization coverage | <a href="http://www.who.int/csr/don/2000_05_19/en/index.html">http://www.who.int/csr/don/2000_05_19/en/index.html</a>   |
| Yellow Fever   | Peru            | 07 June 2001      | breakdown of public health measures | immunization coverage | <a href="http://www.who.int/csr/don/2001_06_07e/en/">http://www.who.int/csr/don/2001_06_07e/en/</a>                     |
| Yellow Fever   | Senegal         | 04 October 2002   | breakdown of public health measures | immunization coverage | <a href="http://www.who.int/csr/don/2002_10_04/en/">http://www.who.int/csr/don/2002_10_04/en/</a>                       |
| Yellow Fever   | Sierra Leone    | 19 August 2003    | breakdown of public health measures | immunization coverage | <a href="http://www.who.int/csr/don/2003_08_19/en/">http://www.who.int/csr/don/2003_08_19/en/</a>                       |
| Yellow Fever   | Venezuela       | 04 November 1998  | breakdown of public health measures | immunization coverage | <a href="http://www.who.int/csr/don/1998_11_04/en/">http://www.who.int/csr/don/1998_11_04/en/</a>                       |
| Yellow Fever   | Venezuela       | 14 September 2004 | breakdown of public health measures | immunization coverage | <a href="http://www.who.int/csr/don/2004_09_14/en/">http://www.who.int/csr/don/2004_09_14/en/</a>                       |
| Cholera        | Burundi         | 18 February 2004  | breakdown of public health measures | sanitation & hygiene  | <a href="http://www.who.int/csr/don/2004_02_18a/en/">http://www.who.int/csr/don/2004_02_18a/en/</a>                     |
| Cholera        | Chad            | 26 July 2001      | breakdown of public health measures | sanitation & hygiene  | <a href="http://www.who.int/csr/don/2001_07_26a/en/">http://www.who.int/csr/don/2001_07_26a/en/</a>                     |
| Cholera        | Cote d'Ivoire   | 08 January 2003   | breakdown of public health measures | sanitation & hygiene  | <a href="http://www.who.int/csr/don/2003_01_08/en/index.html">http://www.who.int/csr/don/2003_01_08/en/index.html</a>   |
| Cholera        | DR Congo        | 16 September 2002 | breakdown of public health measures | sanitation & hygiene  | <a href="http://www.who.int/csr/don/2002_09_16/en/">http://www.who.int/csr/don/2002_09_16/en/</a>                       |
| Cholera        | Guinea          | 26 September 2001 | breakdown of public health measures | sanitation & hygiene  | <a href="http://www.who.int/csr/don/2001_09_26/en/">http://www.who.int/csr/don/2001_09_26/en/</a>                       |
| Cholera        | Iraq            | 08 May 2003       | breakdown of public health measures | sanitation & hygiene  | <a href="http://www.who.int/csr/don/2003_05_08a/en/index.html">http://www.who.int/csr/don/2003_05_08a/en/index.html</a> |
| Cholera        | Liberia         | 03 July 2003      | breakdown of public health measures | sanitation & hygiene  | <a href="http://www.who.int/csr/don/2003_07_03a/en/">http://www.who.int/csr/don/2003_07_03a/en/</a>                     |
| Cholera        | Liberia         | 13 September 2002 | breakdown of public health measures | sanitation & hygiene  | <a href="http://www.who.int/csr/don/2002_09_13a/en/">http://www.who.int/csr/don/2002_09_13a/en/</a>                     |
| Cholera        | Malawi          | 26 March 2002     | breakdown of public health measures | sanitation & hygiene  | <a href="http://www.who.int/csr/don/2002_03_26/en/">http://www.who.int/csr/don/2002_03_26/en/</a>                       |
| Cholera        | Mozambique      | 21 May 2003       | breakdown of public health measures | sanitation & hygiene  | <a href="http://www.who.int/csr/don/2003_05_21/en/">http://www.who.int/csr/don/2003_05_21/en/</a>                       |
| Cholera        | Mozambique      | 28 January 2004   | breakdown of public health measures | sanitation & hygiene  | <a href="http://www.who.int/csr/don/2004_01_28/en/">http://www.who.int/csr/don/2004_01_28/en/</a>                       |
| Cholera        | Tanzania        | 26 July 2001      | breakdown of public health measures | sanitation & hygiene  | <a href="http://www.who.int/csr/don/2001_07_26/en/">http://www.who.int/csr/don/2001_07_26/en/</a>                       |
| Cholera        | Zambia          | 09 May 2003       | breakdown of public health measures | sanitation & hygiene  | <a href="http://www.who.int/csr/don/2003_05_09/en/index.html">http://www.who.int/csr/don/2003_05_09/en/index.html</a>   |
| Cholera        | Comoros Islands | 22 December 1999  | breakdown of public health measures | sanitation & hygiene  | <a href="http://www.who.int/csr/don/1999_12_22/en/">http://www.who.int/csr/don/1999_12_22/en/</a>                       |
| Dysentery      | Sierra Leone    | 24 January 2000   | breakdown of public health measures | sanitation & hygiene  | <a href="http://www.who.int/csr/don/2000_01_24a/en/">http://www.who.int/csr/don/2000_01_24a/en/</a>                     |
| Cholera        | Cote d'Ivoire   | 13 August 2002    | breakdown of public health measures | sanitation & hygiene  | <a href="http://www.who.int/csr/don/2002_08_13a/en/index.html">http://www.who.int/csr/don/2002_08_13a/en/index.html</a> |
| Cholera        | DR Congo        | 15 November 2002  | breakdown of public health measures | sanitation & hygiene  | <a href="http://www.who.int/csr/don/2002_11_15/en/">http://www.who.int/csr/don/2002_11_15/en/</a>                       |
| Cholera        | Senegal         | 02 November 2004  | breakdown of public health measures | sanitation & hygiene  | <a href="http://www.who.int/csr/don/2004_11_02/en/">http://www.who.int/csr/don/2004_11_02/en/</a>                       |
| Cholera        | Sierra Leone    | 14 September 1999 | breakdown of public health measures | sanitation & hygiene  | <a href="http://www.who.int/csr/don/1999_09_14/en/">http://www.who.int/csr/don/1999_09_14/en/</a>                       |
| Plague         | DR Congo        | 13 October 2006   | breakdown of public health measures | sanitation & hygiene  | <a href="http://www.who.int/csr/don/2006_10_13/en/">http://www.who.int/csr/don/2006_10_13/en/</a>                       |
| Plague         | Malawi          | 27 July 1999      | breakdown of public health measures | sanitation & hygiene  | <a href="http://www.who.int/csr/don/1999_07_27/en/">http://www.who.int/csr/don/1999_07_27/en/</a>                       |
| Cholera        | Brazil          | 08 April 1999     | breakdown of public health measures | sanitation & hygiene  | <a href="http://www.who.int/csr/don/1999_04_08/en/">http://www.who.int/csr/don/1999_04_08/en/</a>                       |
| Cholera        | Burundi         | 28 May 1998       | breakdown of public health measures | sanitation & hygiene  | <a href="http://www.who.int/csr/don/1998_05_28/en/">http://www.who.int/csr/don/1998_05_28/en/</a>                       |
| Cholera        | Chile           | 12 January 1998   | breakdown of public health measures | sanitation & hygiene  | <a href="http://www.who.int/csr/don/1998_01_12a/en/">http://www.who.int/csr/don/1998_01_12a/en/</a>                     |
| Cholera        | Iraq            | 26 October 1998   | breakdown of public health measures | sanitation & hygiene  | <a href="http://www.who.int/csr/don/1998_10_26/en/">http://www.who.int/csr/don/1998_10_26/en/</a>                       |
| Cholera        | Madagascar      | 14 April 1999     | breakdown of public health measures | sanitation & hygiene  | <a href="http://www.who.int/csr/don/1999_04_14a/en/">http://www.who.int/csr/don/1999_04_14a/en/</a>                     |
| Cholera        | Mali            | 25 November 2003  | breakdown of public health measures | sanitation & hygiene  | <a href="http://www.who.int/csr/don/2003_11_25/en/">http://www.who.int/csr/don/2003_11_25/en/</a>                       |
| Cholera        | Micronesia      | 06 July 2000      | breakdown of public health measures | sanitation & hygiene  | <a href="http://www.who.int/csr/don/2000_07_06/en/">http://www.who.int/csr/don/2000_07_06/en/</a>                       |
| Cholera        | Mozambique      | 28 June 2002      | breakdown of public health measures | sanitation & hygiene  | <a href="http://www.who.int/csr/don/2002_06_28/en/">http://www.who.int/csr/don/2002_06_28/en/</a>                       |
| Cholera        | Sierra Leone    | 23 September 1998 | breakdown of public health measures | sanitation & hygiene  | <a href="http://www.who.int/csr/don/1998_09_23/en/">http://www.who.int/csr/don/1998_09_23/en/</a>                       |
| Cholera        | Somalia         | 18 December 1998  | breakdown of public health measures | sanitation & hygiene  | <a href="http://www.who.int/csr/don/1998_12_18/en/">http://www.who.int/csr/don/1998_12_18/en/</a>                       |
| Cholera        | Somalia         | 22 November 2000  | breakdown of public health measures | sanitation & hygiene  | <a href="http://www.who.int/csr/don/2000_11_22/en/">http://www.who.int/csr/don/2000_11_22/en/</a>                       |

| <b>Disease</b>              | <b>Country</b>           | <b>Date</b>       | <b>General Driver</b>               | <b>Driver Details</b> | <b>Link</b>                                                                                                             |
|-----------------------------|--------------------------|-------------------|-------------------------------------|-----------------------|-------------------------------------------------------------------------------------------------------------------------|
| Cholera                     | South Africa             | 13 October 2000   | breakdown of public health measures | sanitation & hygiene  | <a href="http://www.who.int/csr/don/2000_10_13/en/">http://www.who.int/csr/don/2000_10_13/en/</a>                       |
| Cholera                     | Sri Lanka                | 25 November 1998  | breakdown of public health measures | sanitation & hygiene  | <a href="http://www.who.int/csr/don/1998_11_25/en/">http://www.who.int/csr/don/1998_11_25/en/</a>                       |
| Cholera                     | Sudan                    | 24 February 2006  | breakdown of public health measures | sanitation & hygiene  | <a href="http://www.who.int/csr/don/2006_02_24/en/">http://www.who.int/csr/don/2006_02_24/en/</a>                       |
| Hand Foot and Mouth Disease | China                    | 01 May 2008       | breakdown of public health measures | sanitation & hygiene  | <a href="http://www.who.int/csr/don/2008_05_01/en/">http://www.who.int/csr/don/2008_05_01/en/</a>                       |
| Hand Foot and Mouth Disease | Malaysia                 | 06 June 1997      | breakdown of public health measures | sanitation & hygiene  | <a href="http://www.who.int/csr/don/1997_07_03/en/">http://www.who.int/csr/don/1997_07_03/en/</a>                       |
| Plague                      | Malawi                   | 05 June 2002      | breakdown of public health measures | sanitation & hygiene  | <a href="http://www.who.int/csr/don/2002_06_05e/en/index.html">http://www.who.int/csr/don/2002_06_05e/en/index.html</a> |
| Cholera                     | Angola                   | 10 May 2006       | breakdown of public health measures | sanitation & hygiene  | <a href="http://www.who.int/csr/don/2006_05_10/en/">http://www.who.int/csr/don/2006_05_10/en/</a>                       |
| Cholera                     | Armenia                  | 11 September 1998 | breakdown of public health measures | sanitation & hygiene  | <a href="http://www.who.int/csr/don/1998_09_11/en/">http://www.who.int/csr/don/1998_09_11/en/</a>                       |
| Cholera                     | Benin                    | 20 November 2003  | breakdown of public health measures | sanitation & hygiene  | <a href="http://www.who.int/csr/don/2003_11_20/en/">http://www.who.int/csr/don/2003_11_20/en/</a>                       |
| Cholera                     | Bhutan                   | 31 August 1998    | breakdown of public health measures | sanitation & hygiene  | <a href="http://www.who.int/csr/don/1998_08_31/en/">http://www.who.int/csr/don/1998_08_31/en/</a>                       |
| Cholera                     | Bolivia                  | 22 January 1997   | breakdown of public health measures | sanitation & hygiene  | <a href="http://www.who.int/csr/don/1997_01_22/en/">http://www.who.int/csr/don/1997_01_22/en/</a>                       |
| Cholera                     | Burkina Faso             | 17 September 2001 | breakdown of public health measures | sanitation & hygiene  | <a href="http://www.who.int/csr/don/2001_09_17a/en/">http://www.who.int/csr/don/2001_09_17a/en/</a>                     |
| Cholera                     | Burundi                  | 09 January 1997   | breakdown of public health measures | sanitation & hygiene  | <a href="http://www.who.int/csr/don/1997_01_09a/en/">http://www.who.int/csr/don/1997_01_09a/en/</a>                     |
| Cholera                     | Cambodia                 | 15 July 1998      | breakdown of public health measures | sanitation & hygiene  | <a href="http://www.who.int/csr/don/1998_07_15/en/">http://www.who.int/csr/don/1998_07_15/en/</a>                       |
| Cholera                     | Cameroon                 | 15 October 1998   | breakdown of public health measures | sanitation & hygiene  | <a href="http://www.who.int/csr/don/1998_10_15/en/">http://www.who.int/csr/don/1998_10_15/en/</a>                       |
| Cholera                     | Cameroon                 | 18 February 2004  | breakdown of public health measures | sanitation & hygiene  | <a href="http://www.who.int/csr/don/2004_02_18a/en/">http://www.who.int/csr/don/2004_02_18a/en/</a>                     |
| Cholera                     | Central African Republic | 30 July 1997      | breakdown of public health measures | sanitation & hygiene  | <a href="http://www.who.int/csr/don/1997_07_30/en/">http://www.who.int/csr/don/1997_07_30/en/</a>                       |
| Cholera                     | Chad                     | 05 July 1996      | breakdown of public health measures | sanitation & hygiene  | <a href="http://www.who.int/csr/don/1996_07_05/en/">http://www.who.int/csr/don/1996_07_05/en/</a>                       |
| Cholera                     | Comoros Islands          | 10 February 1998  | breakdown of public health measures | sanitation & hygiene  | <a href="http://www.who.int/csr/don/1998_02_10b/en/">http://www.who.int/csr/don/1998_02_10b/en/</a>                     |
| Cholera                     | Congo Republic           | 03 February 1998  | breakdown of public health measures | sanitation & hygiene  | <a href="http://www.who.int/csr/don/1998_02_03a/en/index.html">http://www.who.int/csr/don/1998_02_03a/en/index.html</a> |
| Cholera                     | Cote d'Ivoire            | 17 September 2001 | breakdown of public health measures | sanitation & hygiene  | <a href="http://www.who.int/csr/don/2001_09_17a/en/index.html">http://www.who.int/csr/don/2001_09_17a/en/index.html</a> |
| Cholera                     | DR Congo                 | 05 March 2002     | breakdown of public health measures | sanitation & hygiene  | <a href="http://www.who.int/csr/don/2002_03_05/en/">http://www.who.int/csr/don/2002_03_05/en/</a>                       |
| Cholera                     | Iraq                     | 10 September 2007 | breakdown of public health measures | sanitation & hygiene  | <a href="http://www.who.int/csr/don/2007_09_10a/en/">http://www.who.int/csr/don/2007_09_10a/en/</a>                     |
| Cholera                     | Kenya                    | 20 January 1999   | breakdown of public health measures | sanitation & hygiene  | <a href="http://www.who.int/csr/don/1999_01_20/en/">http://www.who.int/csr/don/1999_01_20/en/</a>                       |
| Cholera                     | Kenya                    | 22 September 1997 | breakdown of public health measures | sanitation & hygiene  | <a href="http://www.who.int/csr/don/1997_09_22/en/">http://www.who.int/csr/don/1997_09_22/en/</a>                       |
| Cholera                     | Mongolia                 | 13 August 1996    | breakdown of public health measures | sanitation & hygiene  | <a href="http://www.who.int/csr/don/1996_08_13b/en/">http://www.who.int/csr/don/1996_08_13b/en/</a>                     |
| Cholera                     | Nicaragua; Honduras      | 23 June 1999      | breakdown of public health measures | sanitation & hygiene  | <a href="http://www.who.int/csr/don/1999_06_23/en/">http://www.who.int/csr/don/1999_06_23/en/</a>                       |
| Cholera                     | Niger                    | 17 September 2001 | breakdown of public health measures | sanitation & hygiene  | <a href="http://www.who.int/csr/don/2001_09_17a/en/">http://www.who.int/csr/don/2001_09_17a/en/</a>                     |
| Cholera                     | Niger                    | 24 July 2002      | breakdown of public health measures | sanitation & hygiene  | <a href="http://www.who.int/csr/don/2002_07_24/en/">http://www.who.int/csr/don/2002_07_24/en/</a>                       |
| Cholera                     | Nigeria                  | 01 March 1996     | breakdown of public health measures | sanitation & hygiene  | <a href="http://www.who.int/csr/don/1996_03_01a/en/">http://www.who.int/csr/don/1996_03_01a/en/</a>                     |
| Cholera                     | Nigeria                  | 27 November 2001  | breakdown of public health measures | sanitation & hygiene  | <a href="http://www.who.int/csr/don/2001_11_27/en/">http://www.who.int/csr/don/2001_11_27/en/</a>                       |
| Cholera                     | Philippines              | 12 September 1996 | breakdown of public health measures | sanitation & hygiene  | <a href="http://www.who.int/csr/don/1996_09_12/en/">http://www.who.int/csr/don/1996_09_12/en/</a>                       |
| Cholera                     | Philippines              | 14 June 1996      | breakdown of public health measures | sanitation & hygiene  | <a href="http://www.who.int/csr/don/1996_06_14c/en/">http://www.who.int/csr/don/1996_06_14c/en/</a>                     |
| Cholera                     | Tanzania                 | 06 May 1997       | breakdown of public health measures | sanitation & hygiene  | <a href="http://www.who.int/csr/don/1997_05_06b/en/">http://www.who.int/csr/don/1997_05_06b/en/</a>                     |
| Cholera                     | Uganda                   | 07 April 1998     | breakdown of public health measures | sanitation & hygiene  | <a href="http://www.who.int/csr/don/1998_04_07/en/">http://www.who.int/csr/don/1998_04_07/en/</a>                       |
| Cholera                     | Uganda                   | 19 May 2003       | breakdown of public health measures | sanitation & hygiene  | <a href="http://www.who.int/csr/don/1998_04_07/en/">http://www.who.int/csr/don/1998_04_07/en/</a>                       |
| Cholera                     | Zimbabwe                 | 07 April 1998     | breakdown of public health measures | sanitation & hygiene  | <a href="http://www.who.int/csr/don/1998_04_07b/en/">http://www.who.int/csr/don/1998_04_07b/en/</a>                     |
| Plague                      | Namibia                  | 11 May 1999       | bushmeat                            |                       | <a href="http://www.who.int/csr/don/1999_05_11/en/">http://www.who.int/csr/don/1999_05_11/en/</a>                       |
| Ebola                       | Congo Republic           | 13 May 2005       | bushmeat                            |                       | <a href="http://www.who.int/csr/don/2005_05_13/en/index.html">http://www.who.int/csr/don/2005_05_13/en/index.html</a>   |
| Ebola                       | DR Congo                 | 26 December 2008  | bushmeat                            |                       | <a href="http://www.who.int/csr/don/2008_12_26a/en/">http://www.who.int/csr/don/2008_12_26a/en/</a>                     |
| Ebola                       | DR Congo                 | 31 August 2007    | bushmeat                            |                       | <a href="http://www.who.int/csr/don/2007_08_31a/en/index.html">http://www.who.int/csr/don/2007_08_31a/en/index.html</a> |
| Ebola                       | Gabon                    | 14 October 1996   | bushmeat                            |                       | <a href="http://www.who.int/csr/don/1996_10_14/en/">http://www.who.int/csr/don/1996_10_14/en/</a>                       |
| Ebola                       | Gabon                    | 19 February 1996  | bushmeat                            |                       | <a href="http://www.who.int/csr/don/1996_02_19b/en/">http://www.who.int/csr/don/1996_02_19b/en/</a>                     |
| Ebola                       | Sudan                    | 18 May 2004       | bushmeat                            |                       | <a href="http://www.who.int/csr/don/2004_05_18/en/index.html">http://www.who.int/csr/don/2004_05_18/en/index.html</a>   |

| <b>Disease</b>         | <b>Country</b>       | <b>Date</b>       | <b>General Driver</b>               | <b>Driver Details</b> | <b>Link</b>                                                                                                             |
|------------------------|----------------------|-------------------|-------------------------------------|-----------------------|-------------------------------------------------------------------------------------------------------------------------|
| Ebola                  | Uganda               | 16 October 2000   | bushmeat                            |                       | <a href="http://www.who.int/csr/don/2000_10_16/en/">http://www.who.int/csr/don/2000_10_16/en/</a>                       |
| Ebola                  | Uganda               | 30 November 2007  | bushmeat                            |                       | <a href="http://www.who.int/csr/don/2007_11_30a/en/">http://www.who.int/csr/don/2007_11_30a/en/</a>                     |
| Monkeypox              | DR Congo             | 21 March 1997     | bushmeat                            |                       | <a href="http://www.who.int/csr/don/1997_03_21c/en/">http://www.who.int/csr/don/1997_03_21c/en/</a>                     |
| Plague                 | Malawi               | 30 October 1997   | climate & weather                   |                       | <a href="http://www.who.int/csr/don/1997_10_30/en/">http://www.who.int/csr/don/1997_10_30/en/</a>                       |
| Plague                 | Mozambique           | 08 August 1997    | climate & weather                   |                       | <a href="http://www.who.int/csr/don/1997_08_08/en/">http://www.who.int/csr/don/1997_08_08/en/</a>                       |
| Cholera                | Djibouti             | 21 November 1997  | climate & weather                   |                       | <a href="http://www.who.int/csr/don/1997_11_21b/en/">http://www.who.int/csr/don/1997_11_21b/en/</a>                     |
| Cholera                | Mozambique           | 02 September 1997 | climate & weather                   |                       | <a href="http://www.who.int/csr/don/1997_09_02b/en/">http://www.who.int/csr/don/1997_09_02b/en/</a>                     |
| Cholera                | Zambia               | 28 January 2004   | climate & weather                   |                       | <a href="http://www.who.int/csr/don/2004_01_28/en/">http://www.who.int/csr/don/2004_01_28/en/</a>                       |
| Dengue                 | Venezuela            | 13 August 1996    | climate & weather                   |                       | <a href="http://www.who.int/csr/don/1996_08_13a/en/">http://www.who.int/csr/don/1996_08_13a/en/</a>                     |
| Dengue                 | Brazil               | 21 March 2002     | climate & weather                   |                       | <a href="http://www.who.int/csr/don/2002_03_21/en/">http://www.who.int/csr/don/2002_03_21/en/</a>                       |
| Dengue                 | Cook Islands         | 28 February 1997  | climate & weather                   |                       | <a href="http://www.who.int/csr/don/1997_02_28a/en/">http://www.who.int/csr/don/1997_02_28a/en/</a>                     |
| Dengue                 | El Salvador          | 21 June 2002      | climate & weather                   |                       | <a href="http://www.who.int/csr/don/2002_06_21e/en/">http://www.who.int/csr/don/2002_06_21e/en/</a>                     |
| Dengue                 | India                | 17 October 1996   | climate & weather                   |                       | <a href="http://www.who.int/csr/don/1996_10_17a/en/">http://www.who.int/csr/don/1996_10_17a/en/</a>                     |
| Dengue                 | Indonesia            | 26 February 2004  | climate & weather                   |                       | <a href="http://www.who.int/csr/don/2004_02_26a/en/">http://www.who.int/csr/don/2004_02_26a/en/</a>                     |
| Dengue                 | Madagascar; Maldives | 17 March 2006     | climate & weather                   |                       | <a href="http://www.who.int/csr/don/2006_03_17/en/">http://www.who.int/csr/don/2006_03_17/en/</a>                       |
| Dengue                 | Timor-Leste          | 31 January 2005   | climate & weather                   |                       | <a href="http://www.who.int/csr/don/2005_01_31/en/">http://www.who.int/csr/don/2005_01_31/en/</a>                       |
| Encephalitis           | United States        | 10 September 1999 | climate & weather                   |                       | <a href="http://www.who.int/csr/don/1999_09_10/en/">http://www.who.int/csr/don/1999_09_10/en/</a>                       |
| West Nile Virus        | Canada               | 12 September 2002 | climate & weather                   |                       | <a href="http://www.who.int/csr/don/2002_09_12b/en/">http://www.who.int/csr/don/2002_09_12b/en/</a>                     |
| West Nile Virus        | United States        | 27 August 2002    | climate & weather                   |                       | <a href="http://www.who.int/csr/don/2002_08_27/en/">http://www.who.int/csr/don/2002_08_27/en/</a>                       |
| Avian Influenza        | China                | 04 December 2007  | food & agriculture industry changes |                       | <a href="http://www.who.int/csr/don/2007_12_04/en/index.html">http://www.who.int/csr/don/2007_12_04/en/index.html</a>   |
| Avian Influenza        | China                | 20 February 2008  | food & agriculture industry changes |                       | <a href="http://www.who.int/csr/don/2008_02_20/en/index.html">http://www.who.int/csr/don/2008_02_20/en/index.html</a>   |
| Avian Influenza        | Indonesia            | 21 July 2005      | food & agriculture industry changes |                       | <a href="http://www.who.int/csr/don/2005_07_21a/en/">http://www.who.int/csr/don/2005_07_21a/en/</a>                     |
| Avian Influenza        | Nigeria              | 31 January 2007   | food & agriculture industry changes |                       | <a href="http://www.who.int/csr/don/2007_01_31a/en/">http://www.who.int/csr/don/2007_01_31a/en/</a>                     |
| Avian Influenza        | Vietnam              | 13 January 2004   | food & agriculture industry changes |                       | <a href="http://www.who.int/csr/don/2004_01_13/en/">http://www.who.int/csr/don/2004_01_13/en/</a>                       |
| Avian Influenza        | Hong Kong            | 05 January 1998   | food & agriculture industry changes |                       | <a href="http://www.who.int/csr/don/1998_01_05/en/index.html">http://www.who.int/csr/don/1998_01_05/en/index.html</a>   |
| Avian Influenza        | Hong Kong            | 07 April 1999     | food & agriculture industry changes |                       | <a href="http://www.who.int/csr/don/1999_04_07c/en/index.html">http://www.who.int/csr/don/1999_04_07c/en/index.html</a> |
| Avian Influenza        | Hong Kong            | 19 February 2003  | food & agriculture industry changes |                       | <a href="http://www.who.int/csr/don/2003_2_19/en/">http://www.who.int/csr/don/2003_2_19/en/</a>                         |
| Hantavirus             | Panama               | 02 March 2000     | food & agriculture industry changes |                       | <a href="http://www.who.int/csr/don/2000_03_02a/en/">http://www.who.int/csr/don/2000_03_02a/en/</a>                     |
| Japanese Encephalitis  | Nepal                | 04 October 1996   | food & agriculture industry changes |                       | <a href="http://www.who.int/csr/don/1996_10_04/en/">http://www.who.int/csr/don/1996_10_04/en/</a>                       |
| Marburg Fever          | DR Congo             | 30 April 1999     | food & agriculture industry changes |                       | <a href="http://www.who.int/csr/don/1999_04_30/en/">http://www.who.int/csr/don/1999_04_30/en/</a>                       |
| Plague                 | Zambia               | 20 March 2001     | food & agriculture industry changes |                       | <a href="http://www.who.int/csr/don/2001_03_20a/en/">http://www.who.int/csr/don/2001_03_20a/en/</a>                     |
| Swine Influenza (H1N1) | Mexico               | 24 April 2009     | food & agriculture industry changes |                       | <a href="http://www.who.int/csr/don/2009_04_24/en/index.html">http://www.who.int/csr/don/2009_04_24/en/index.html</a>   |
| Typhoid                | Tadjikistan          | 28 February 1997  | food & agriculture industry changes |                       | <a href="http://www.who.int/csr/don/1997_02_28b/en/">http://www.who.int/csr/don/1997_02_28b/en/</a>                     |
| Plague                 | Algeria              | 24 June 2003      | food & agriculture industry changes |                       | <a href="http://www.who.int/csr/don/2003_06_24a/en/">http://www.who.int/csr/don/2003_06_24a/en/</a>                     |
| Leptospirosis          | Kenya                | 17 June 2004      | human demographics & behavior       |                       | <a href="http://www.who.int/csr/don/2004_06_17a/en/">http://www.who.int/csr/don/2004_06_17a/en/</a>                     |
| Plague                 | DR Congo             | 14 June 2006      | human demographics & behavior       |                       | <a href="http://www.who.int/csr/don/2006_06_14/en/">http://www.who.int/csr/don/2006_06_14/en/</a>                       |
| Chikungunya            | France               | 17 February 2006  | human demographics & behavior       |                       | <a href="http://www.who.int/csr/don/2006_02_17a/en/">http://www.who.int/csr/don/2006_02_17a/en/</a>                     |
| Meningitis             | Mozambique           | 11 July 1996      | human demographics & behavior       |                       | <a href="http://www.who.int/csr/don/1996_07_11/en/">http://www.who.int/csr/don/1996_07_11/en/</a>                       |
| Cholera                | Niger                | 03 August 1999    | human demographics & behavior       |                       | <a href="http://www.who.int/csr/don/1999_08_03/en/">http://www.who.int/csr/don/1999_08_03/en/</a>                       |
| Diphtheria             | Laos; Thailand       | 19 July 1996      | human demographics & behavior       |                       | <a href="http://www.who.int/csr/don/1996_07_19a/en/">http://www.who.int/csr/don/1996_07_19a/en/</a>                     |
| Influenza              | DR Congo             | 29 November 2002  | human demographics & behavior       |                       | <a href="http://www.who.int/csr/don/2002_11_29a/en/index.html">http://www.who.int/csr/don/2002_11_29a/en/index.html</a> |
| Leptospirosis          | India                | 27 October 1997   | human demographics & behavior       |                       | <a href="http://www.who.int/csr/don/1997_10_27/en/">http://www.who.int/csr/don/1997_10_27/en/</a>                       |
| Meningitis             | Angola               | 06 August 1998    | human demographics & behavior       |                       | <a href="http://www.who.int/csr/don/1998_08_06/en/">http://www.who.int/csr/don/1998_08_06/en/</a>                       |
| Meningitis             | Angola               | 30 July 1996      | human demographics & behavior       |                       | <a href="http://www.who.int/csr/don/1996_07_30b/en/">http://www.who.int/csr/don/1996_07_30b/en/</a>                     |
| Meningitis             | Cyprus               | 12 August 1996    | human demographics & behavior       |                       | <a href="http://www.who.int/csr/don/1996_08_12b/en/">http://www.who.int/csr/don/1996_08_12b/en/</a>                     |

| <b>Disease</b>     | <b>Country</b>           | <b>Date</b>       | <b>General Driver</b>             | <b>Driver Details</b> | <b>Link</b>                                                                                                             |
|--------------------|--------------------------|-------------------|-----------------------------------|-----------------------|-------------------------------------------------------------------------------------------------------------------------|
| Meningitis         | Guinea-Bissau            | 26 February 1999  | human demographics & behavior     |                       | <a href="http://www.who.int/csr/don/1999_02_26b/en/">http://www.who.int/csr/don/1999_02_26b/en/</a>                     |
| Meningitis         | Hungary                  | 01 January 2000   | human demographics & behavior     |                       | <a href="http://www.who.int/csr/don/2000_01_01/en/index.html">http://www.who.int/csr/don/2000_01_01/en/index.html</a>   |
| Meningitis         | Romania                  | 02 September 1996 | human demographics & behavior     |                       | <a href="http://www.who.int/csr/don/1996_09_02a/en/">http://www.who.int/csr/don/1996_09_02a/en/</a>                     |
| Meningitis         | Somalia                  | 07 December 2001  | human demographics & behavior     |                       | <a href="http://www.who.int/csr/don/2001_12_07/en/index.html">http://www.who.int/csr/don/2001_12_07/en/index.html</a>   |
| Plague             | India                    | 20 February 2002  | human demographics & behavior     |                       | <a href="http://www.who.int/csr/don/2002_02_20/en/">http://www.who.int/csr/don/2002_02_20/en/</a>                       |
| Shigellosis        | Cameroon                 | 29 April 1998     | human demographics & behavior     |                       | <a href="http://www.who.int/csr/don/1998_04_29/en/">http://www.who.int/csr/don/1998_04_29/en/</a>                       |
| Undiagnosed        |                          |                   |                                   |                       | <a href="http://www.who.int/csr/don/1998_10_22b/en/">http://www.who.int/csr/don/1998_10_22b/en/</a>                     |
| Pneumonia          | Sudan                    | 22 October 1998   | human demographics & behavior     |                       |                                                                                                                         |
| Whooping Cough     | Afghanistan              | 08 January 2003   | human demographics & behavior     |                       | <a href="http://www.who.int/csr/don/2003_01_08a/en/">http://www.who.int/csr/don/2003_01_08a/en/</a>                     |
| Enterovirus        | Taiwan                   | 17 June 1998      | human demographics & behavior     |                       | <a href="http://www.who.int/csr/don/1998_06_17e/en/">http://www.who.int/csr/don/1998_06_17e/en/</a>                     |
| Meningitis         | Palestinian Authority    | 07 July 1997      | human demographics & behavior     |                       | <a href="http://www.who.int/csr/don/1997_07_07/en/">http://www.who.int/csr/don/1997_07_07/en/</a>                       |
| Meningitis         | Uganda                   | 25 January 2006   | human susceptibility to infection |                       | <a href="http://www.who.int/csr/don/2006_01_25/en/index.html">http://www.who.int/csr/don/2006_01_25/en/index.html</a>   |
| Meningitis         | Sudan                    | 12 January 1999   | human susceptibility to infection |                       | <a href="http://www.who.int/csr/don/1999_01_12/en/">http://www.who.int/csr/don/1999_01_12/en/</a>                       |
| Lassa Fever        | Sierra Leone             | 15 May 1996       | international travel & commerce   |                       | <a href="http://www.who.int/csr/don/1996_05_15/en/">http://www.who.int/csr/don/1996_05_15/en/</a>                       |
| Avian Influenza    | Thailand                 | 23 January 2004   | international travel & commerce   |                       | <a href="http://www.who.int/csr/don/2004_01_23/en/">http://www.who.int/csr/don/2004_01_23/en/</a>                       |
| Cholera            | South Africa             | 18 February 2004  | international travel & commerce   |                       | <a href="http://www.who.int/csr/don/2004_02_18a/en/">http://www.who.int/csr/don/2004_02_18a/en/</a>                     |
| Dengue             | Honduras                 | 19 July 2002      | international travel & commerce   |                       | <a href="http://www.who.int/csr/don/2002_07_19b/en/">http://www.who.int/csr/don/2002_07_19b/en/</a>                     |
| Influenza          | DR Congo                 | 12 February 2003  | international travel & commerce   |                       | <a href="http://www.who.int/csr/don/2003_02_12/en/">http://www.who.int/csr/don/2003_02_12/en/</a>                       |
| Lassa Fever        | Sierra Leone             | 20 April 2004     | international travel & commerce   |                       | <a href="http://www.who.int/csr/don/2004_04_20a/en/">http://www.who.int/csr/don/2004_04_20a/en/</a>                     |
| Meningitis         | Rwanda                   | 24 August 2000    | international travel & commerce   |                       | <a href="http://www.who.int/csr/don/2000_08_24/en/index.html">http://www.who.int/csr/don/2000_08_24/en/index.html</a>   |
| Nipah/Hendra Virus | Bangladesh               | 12 February 2004  | international travel & commerce   |                       | <a href="http://www.who.int/csr/don/2004_02_12/en/">http://www.who.int/csr/don/2004_02_12/en/</a>                       |
| Nipah/Hendra Virus | Bangladesh               | 20 April 2004     | international travel & commerce   |                       | <a href="http://www.who.int/csr/don/2004_04_20/en/">http://www.who.int/csr/don/2004_04_20/en/</a>                       |
| Nipah/Hendra Virus | Bangladesh               | 25 May 2001       | international travel & commerce   |                       | <a href="http://www.who.int/csr/don/2001_05_25a/en/index.html">http://www.who.int/csr/don/2001_05_25a/en/index.html</a> |
| Virus              | Malaysia; Singapore      | 22 March 1999     | international travel & commerce   |                       | <a href="http://www.who.int/csr/don/1999_03_22a/en/index.html">http://www.who.int/csr/don/1999_03_22a/en/index.html</a> |
| Poliomyelitis      | Angola                   | 28 April 1999     | international travel & commerce   |                       | <a href="http://www.who.int/csr/don/1999_04_28b/en/">http://www.who.int/csr/don/1999_04_28b/en/</a>                     |
| Poliomyelitis      | Chad                     | 29 October 2003   | international travel & commerce   |                       | <a href="http://www.who.int/csr/don/2003_10_29/en/">http://www.who.int/csr/don/2003_10_29/en/</a>                       |
| Poliomyelitis      | Yemen                    | 25 April 2005     | international travel & commerce   |                       | <a href="http://www.who.int/csr/don/2005_04_25/en/">http://www.who.int/csr/don/2005_04_25/en/</a>                       |
| SARS               | China                    | 11 February 2003  | international travel & commerce   |                       | <a href="http://www.who.int/csr/don/2003_02_11/en/index.html">http://www.who.int/csr/don/2003_02_11/en/index.html</a>   |
| West Nile Virus    | Israel                   | 22 September 2000 | international travel & commerce   |                       | <a href="http://www.who.int/csr/don/2000_09_22/en/index.html">http://www.who.int/csr/don/2000_09_22/en/index.html</a>   |
| Meningitis         | Kenya                    | 03 March 2006     | international travel & commerce   |                       | <a href="http://www.who.int/csr/don/2006_03_03a/en/">http://www.who.int/csr/don/2006_03_03a/en/</a>                     |
| Avian Influenza    | Cambodia                 | 02 February 2005  | international travel & commerce   |                       | <a href="http://www.who.int/csr/don/2005_02_02/en/">http://www.who.int/csr/don/2005_02_02/en/</a>                       |
| Meningitis         | Burundi                  | 23 August 2002    | international travel & commerce   |                       | <a href="http://www.who.int/csr/don/2002_08_23a/en/index.html">http://www.who.int/csr/don/2002_08_23a/en/index.html</a> |
| Meningitis         | Rwanda                   | 23 August 2002    | international travel & commerce   |                       | <a href="http://www.who.int/csr/don/2002_08_23a/en/index.html">http://www.who.int/csr/don/2002_08_23a/en/index.html</a> |
| Rift Valley Fever  | Madagascar               | 18 April 2008     | land use changes                  |                       | <a href="http://www.who.int/csr/don/2008_04_18a/en/">http://www.who.int/csr/don/2008_04_18a/en/</a>                     |
| Rift Valley Fever  | Saudi Arabia             | 18 September 2000 | land use changes                  |                       | <a href="http://www.who.int/csr/don/2000_09_18/en/">http://www.who.int/csr/don/2000_09_18/en/</a>                       |
| Rift Valley Fever  | Sudan                    | 05 November 2007  | land use changes                  |                       | <a href="http://www.who.int/csr/don/2007_11_05/en/">http://www.who.int/csr/don/2007_11_05/en/</a>                       |
| Rift Valley Fever  | Tanzania                 | 23 March 2007     | land use changes                  |                       | <a href="http://www.who.int/csr/don/2007_03_23/en/">http://www.who.int/csr/don/2007_03_23/en/</a>                       |
| Cholera            | Brunei Darussalam        | 23 June 1999      | unspecified                       |                       | <a href="http://www.who.int/csr/don/1999_06_23/en/">http://www.who.int/csr/don/1999_06_23/en/</a>                       |
| Influenza          | Madagascar               | 05 August 2002    | unspecified                       |                       | <a href="http://www.who.int/csr/don/2002_08_05/en/">http://www.who.int/csr/don/2002_08_05/en/</a>                       |
| Meningitis         | Angola                   | 15 August 2001    | unspecified                       |                       | <a href="http://www.who.int/csr/don/2001_08_15a/en/index.html">http://www.who.int/csr/don/2001_08_15a/en/index.html</a> |
| Meningitis         | Central African Republic | 08 April 2004     | unspecified                       |                       | <a href="http://www.who.int/csr/don/2004_04_08a/en/index.html">http://www.who.int/csr/don/2004_04_08a/en/index.html</a> |
| Meningitis         | Chad                     | 08 April 2004     | unspecified                       |                       | <a href="http://www.who.int/csr/don/2004_04_08b/en/index.html">http://www.who.int/csr/don/2004_04_08b/en/index.html</a> |
| Meningitis         | Ethiopia                 | 19 March 1999     | unspecified                       |                       | <a href="http://www.who.int/csr/don/1999_03_19b/en/index.html">http://www.who.int/csr/don/1999_03_19b/en/index.html</a> |

| <b>Disease</b>                  | <b>Country</b>                                                                                            | <b>Date</b>       | <b>General Driver</b>               | <b>Driver Details</b> | <b>Link</b>                                                                                                             |
|---------------------------------|-----------------------------------------------------------------------------------------------------------|-------------------|-------------------------------------|-----------------------|-------------------------------------------------------------------------------------------------------------------------|
| Meningitis                      | Zimbabwe                                                                                                  | 02 September 1997 | unspecified                         |                       | <a href="http://www.who.int/csr/don/1997_09_02a/en/">http://www.who.int/csr/don/1997_09_02a/en/</a>                     |
| O'nyong-Nyong                   |                                                                                                           |                   |                                     |                       | <a href="http://www.who.int/csr/don/1997_03_12/en/">http://www.who.int/csr/don/1997_03_12/en/</a>                       |
| Fever                           | Uganda                                                                                                    | 12 March 1997     | unspecified                         |                       |                                                                                                                         |
| Shigellosis                     | Guinea                                                                                                    | 14 July 1999      | unspecified                         |                       | <a href="http://www.who.int/csr/don/1999_07_14/en/">http://www.who.int/csr/don/1999_07_14/en/</a>                       |
| Shigellosis                     | Liberia                                                                                                   | 30 September 2003 | unspecified                         |                       | <a href="http://www.who.int/csr/don/2003_09_30/en/index.html">http://www.who.int/csr/don/2003_09_30/en/index.html</a>   |
| Typhoid                         | Kyrgyzstan                                                                                                | 21 September 1998 | unspecified                         |                       | <a href="http://www.who.int/csr/don/1998_09_21/en/">http://www.who.int/csr/don/1998_09_21/en/</a>                       |
| Dengue                          | Cuba                                                                                                      | 18 June 1997      | unspecified                         |                       | <a href="http://www.who.int/csr/don/1997_06_18/en/">http://www.who.int/csr/don/1997_06_18/en/</a>                       |
| Cholera                         | Sudan                                                                                                     | 26 March 1999     | unspecified                         |                       | <a href="http://www.who.int/csr/don/1999_03_26a/en/index.html">http://www.who.int/csr/don/1999_03_26a/en/index.html</a> |
| Avian Influenza                 | Egypt                                                                                                     | 26 December 2007  | unspecified                         |                       | <a href="http://www.who.int/csr/don/2007_12_26a/en/index.html">http://www.who.int/csr/don/2007_12_26a/en/index.html</a> |
| Avian Influenza                 | Vietnam                                                                                                   | 28 December 2007  | unspecified                         |                       | <a href="http://www.who.int/csr/don/2007_12_28/en/">http://www.who.int/csr/don/2007_12_28/en/</a>                       |
| Dengue                          | Ecuador                                                                                                   | 16 August 2002    | unspecified                         |                       | <a href="http://www.who.int/csr/don/2002_08_16/en/">http://www.who.int/csr/don/2002_08_16/en/</a>                       |
| Dengue                          | Ecuador                                                                                                   | 16 August 2002    | unspecified                         |                       | <a href="http://www.who.int/csr/don/2002_08_16/en/">http://www.who.int/csr/don/2002_08_16/en/</a>                       |
| Marburg Fever                   | Uganda                                                                                                    | 03 August 2007    | unspecified                         |                       | <a href="http://www.who.int/csr/don/2007_08_03/en/">http://www.who.int/csr/don/2007_08_03/en/</a>                       |
| Meningitis                      | India                                                                                                     | 09 May 2005       | unspecified                         |                       | <a href="http://www.who.int/csr/don/2005_05_09/en/index.html">http://www.who.int/csr/don/2005_05_09/en/index.html</a>   |
| Meningitis                      | Philippines                                                                                               | 11 January 2005   | unspecified                         |                       | <a href="http://www.who.int/csr/don/2005_01_11/en/">http://www.who.int/csr/don/2005_01_11/en/</a>                       |
| Meningitis                      | Sudan                                                                                                     | 03 February 2006  | unspecified                         |                       | <a href="http://www.who.int/csr/don/2006_02_03/en/index.html">http://www.who.int/csr/don/2006_02_03/en/index.html</a>   |
| Mycarditis                      | Sri Lanka                                                                                                 | 17 March 2005     | unspecified                         |                       | <a href="http://www.who.int/csr/don/2005_03_17a/en/">http://www.who.int/csr/don/2005_03_17a/en/</a>                     |
| Influenza                       | Afghanistan                                                                                               | 24 February 1999  | unspecified                         |                       | <a href="http://www.who.int/csr/don/1999_02_24/en/index.html">http://www.who.int/csr/don/1999_02_24/en/index.html</a>   |
| Relapsing Fever                 | Sudan                                                                                                     | 07 April 1999     | unspecified                         |                       | <a href="http://www.who.int/csr/don/1999_04_07b/en/index.html">http://www.who.int/csr/don/1999_04_07b/en/index.html</a> |
| Plague                          | Uganda                                                                                                    | 06 November 1998  | unspecified                         |                       | <a href="http://www.who.int/csr/don/1998_11_06a/en/">http://www.who.int/csr/don/1998_11_06a/en/</a>                     |
| Marburg Fever                   | Angola                                                                                                    | 17 March 2005     | war & famine                        |                       | <a href="http://www.who.int/csr/don/2005_03_17b/en/index.html">http://www.who.int/csr/don/2005_03_17b/en/index.html</a> |
| Crimean-Congo Hemorrhagic Fever | Mauritania                                                                                                | 11 March 2003     | war & famine                        |                       | <a href="http://www.who.int/csr/don/2003_03_11/en/">http://www.who.int/csr/don/2003_03_11/en/</a>                       |
|                                 | Cambodia; southeast Asia (Malaysia; Taiwan; Cambodia; Vietnam; Thailand; Philippines; Indonesia; Myanmar) |                   |                                     |                       | <a href="http://www.who.int/csr/don/1998_02_13/en/index.html">http://www.who.int/csr/don/1998_02_13/en/index.html</a>   |
| Dengue                          | Indonesia; Myanmar)                                                                                       | 13 February 1998  | war & famine                        |                       |                                                                                                                         |
| Dengue                          | India                                                                                                     | 30 October 2003   | war & famine                        |                       | <a href="http://www.who.int/csr/don/2003_10_30/en/">http://www.who.int/csr/don/2003_10_30/en/</a>                       |
| Dengue                          | Malaysia                                                                                                  | 31 July 1997      | war & famine                        |                       | <a href="http://www.who.int/csr/don/1997_07_31a/en/">http://www.who.int/csr/don/1997_07_31a/en/</a>                     |
| Undiagnosed Hemorrhagic Fever   | Afghanistan                                                                                               | 19 June 2000      | war & famine                        |                       | <a href="http://www.who.int/csr/don/2000_06_19e/en/">http://www.who.int/csr/don/2000_06_19e/en/</a>                     |
| Cholera                         | Niger                                                                                                     | 29 July 2005      | war & famine                        |                       | <a href="http://www.who.int/csr/don/2005_07_29b/en/">http://www.who.int/csr/don/2005_07_29b/en/</a>                     |
| Typhoid                         | Algeria                                                                                                   | 22 January 1996   | breakdown of public health measures | sanitation & hygiene  | <a href="http://www.who.int/csr/don/1996_01_22e/en/">http://www.who.int/csr/don/1996_01_22e/en/</a>                     |
| Cholera                         | Chad                                                                                                      | 28 January 2004   | breakdown of public health measures | sanitation & hygiene  | <a href="http://www.who.int/csr/don/2004_01_28/en/">http://www.who.int/csr/don/2004_01_28/en/</a>                       |
| Legionnaires'                   | Australia                                                                                                 | 04 May 2000       | breakdown of public health measures | sanitation & hygiene  | <a href="http://www.who.int/csr/don/2000_05_04/en/">http://www.who.int/csr/don/2000_05_04/en/</a>                       |
| Legionnaires'                   | Spain                                                                                                     | 12 July 2001      | breakdown of public health measures | sanitation & hygiene  | <a href="http://www.who.int/csr/don/2001_07_12/en/index.html">http://www.who.int/csr/don/2001_07_12/en/index.html</a>   |
| Cholera                         | Brazil                                                                                                    | 25 November 1998  | breakdown of public health measures | sanitation & hygiene  | <a href="http://www.who.int/csr/don/1998_11_25a/en/">http://www.who.int/csr/don/1998_11_25a/en/</a>                     |
| Cholera                         | Burundi                                                                                                   | 19 July 2002      | breakdown of public health measures | sanitation & hygiene  | <a href="http://www.who.int/csr/don/2002_07_19/en/">http://www.who.int/csr/don/2002_07_19/en/</a>                       |
| Cholera                         | Nigeria                                                                                                   | 12 May 1999       | breakdown of public health measures | sanitation & hygiene  | <a href="http://www.who.int/csr/don/1999_05_12/en/">http://www.who.int/csr/don/1999_05_12/en/</a>                       |
| Cholera                         | Nigeria                                                                                                   | 03 December 2004  | breakdown of public health measures | sanitation & hygiene  | <a href="http://www.who.int/csr/don/2004_12_03/en/">http://www.who.int/csr/don/2004_12_03/en/</a>                       |
| Cholera                         | Russia                                                                                                    | 23 October 1998   | breakdown of public health measures | sanitation & hygiene  | <a href="http://www.who.int/csr/don/1998_10_23/en/">http://www.who.int/csr/don/1998_10_23/en/</a>                       |
| Cholera                         | Rwanda                                                                                                    | 18 November 1999  | breakdown of public health measures | sanitation & hygiene  | <a href="http://www.who.int/csr/don/1999_11_18/en/">http://www.who.int/csr/don/1999_11_18/en/</a>                       |
| Cholera                         | Zimbabwe                                                                                                  | 02 December 2008  | breakdown of public health measures | sanitation & hygiene  | <a href="http://www.who.int/csr/don/2008_12_02/en/">http://www.who.int/csr/don/2008_12_02/en/</a>                       |
| Typhoid                         | DR Congo                                                                                                  | 15 December 2004  | breakdown of public health measures | sanitation & hygiene  | <a href="http://www.who.int/csr/don/2004_12_15/en/">http://www.who.int/csr/don/2004_12_15/en/</a>                       |

| <b>Disease</b>        | <b>Country</b> | <b>Date</b>       | <b>General Driver</b>               | <b>Driver Details</b> | <b>Link</b>                                                                                                             |
|-----------------------|----------------|-------------------|-------------------------------------|-----------------------|-------------------------------------------------------------------------------------------------------------------------|
| Hepatitis             | Sudan          | 10 August 2004    | breakdown of public health measures | sanitation & hygiene  | <a href="http://www.who.int/csr/don/2004_08_10/en/">http://www.who.int/csr/don/2004_08_10/en/</a>                       |
| Cholera               | Cambodia       | 21 May 1999       | breakdown of public health measures | sanitation & hygiene  | <a href="http://www.who.int/csr/don/1999_05_21/en/">http://www.who.int/csr/don/1999_05_21/en/</a>                       |
| Cholera               | DR Congo       | 06 January 1998   | breakdown of public health measures | sanitation & hygiene  | <a href="http://www.who.int/csr/don/1998_01_06a/en/">http://www.who.int/csr/don/1998_01_06a/en/</a>                     |
| Cholera               | Iraq           | 10 September 2008 | breakdown of public health measures | sanitation & hygiene  | <a href="http://www.who.int/csr/don/2008_09_10a/en/">http://www.who.int/csr/don/2008_09_10a/en/</a>                     |
| Dysentery             | Lesotho        | 28 January 2000   | breakdown of public health measures | sanitation & hygiene  | <a href="http://www.who.int/csr/don/2000_01_28a/en/">http://www.who.int/csr/don/2000_01_28a/en/</a>                     |
| Cholera               | Somalia        | 02 May 2000       | climate & weather                   |                       | <a href="http://www.who.int/csr/don/2000_05_02/en/">http://www.who.int/csr/don/2000_05_02/en/</a>                       |
| Cholera               | Somalia        | 15 April 1997     | climate & weather                   |                       | <a href="http://www.who.int/csr/don/1997_04_15a/en/index.html">http://www.who.int/csr/don/1997_04_15a/en/index.html</a> |
| Malaria               | Kenya          | 14 July 1999      | climate & weather                   |                       | <a href="http://www.who.int/csr/don/1999_07_14a/en/">http://www.who.int/csr/don/1999_07_14a/en/</a>                     |
| Cholera               | Burundi        | 23 June 1999      | climate & weather                   |                       | <a href="http://www.who.int/csr/don/1999_06_23/en/">http://www.who.int/csr/don/1999_06_23/en/</a>                       |
| Cholera               | Bolivia        | 31 March 1998     | climate & weather                   |                       | <a href="http://www.who.int/csr/don/1998_03_31/en/">http://www.who.int/csr/don/1998_03_31/en/</a>                       |
| Cholera               | Ecuador        | 31 March 1998     | climate & weather                   |                       | <a href="http://www.who.int/csr/don/1998_03_31/en/">http://www.who.int/csr/don/1998_03_31/en/</a>                       |
| Cholera               | Honduras       | 31 March 1998     | climate & weather                   |                       | <a href="http://www.who.int/csr/don/1998_03_31/en/">http://www.who.int/csr/don/1998_03_31/en/</a>                       |
| Cholera               | Nicaragua      | 31 March 1998     | climate & weather                   |                       | <a href="http://www.who.int/csr/don/1998_03_31/en/">http://www.who.int/csr/don/1998_03_31/en/</a>                       |
| Cholera               | Ethiopia       | 04 October 2006   | climate & weather                   |                       | <a href="http://www.who.int/csr/don/2006_10_04/en/index.html">http://www.who.int/csr/don/2006_10_04/en/index.html</a>   |
| Cholera               | Chad           | 01 September 2004 | climate & weather                   |                       | <a href="http://www.who.int/csr/don/2004_09_01/en/">http://www.who.int/csr/don/2004_09_01/en/</a>                       |
| Cholera               | Peru           | 25 February 1998  | climate & weather                   |                       | <a href="http://www.who.int/csr/don/1998_02_25/en/">http://www.who.int/csr/don/1998_02_25/en/</a>                       |
| Cholera               | Liberia        | 03 August 1998    | climate & weather                   |                       | <a href="http://www.who.int/csr/don/1998_08_03/en/">http://www.who.int/csr/don/1998_08_03/en/</a>                       |
| Cholera               | Niger          | 02 June 2004      | climate & weather                   |                       | <a href="http://www.who.int/csr/don/2004_06_02/en/">www.who.int/csr/don/2004_06_02/en/</a>                              |
| Malaria               | Tanzania       | 19 May 1998       | climate & weather                   |                       | <a href="http://www.who.int/csr/don/1998_05_19/en/index.html">http://www.who.int/csr/don/1998_05_19/en/index.html</a>   |
| Cholera               | Mozambique     | 03 February 1998  | climate & weather                   |                       | <a href="http://www.who.int/csr/don/1998_02_03b/en/">http://www.who.int/csr/don/1998_02_03b/en/</a>                     |
| Cholera               | DR Congo       | 09 December 1999  | climate & weather                   |                       | <a href="http://www.who.int/csr/don/1999_12_09/en/">http://www.who.int/csr/don/1999_12_09/en/</a>                       |
| Cholera               | India          | 14 August 2001    | climate & weather                   |                       | <a href="http://www.who.int/csr/don/2001_08_14/en/">http://www.who.int/csr/don/2001_08_14/en/</a>                       |
| Typhoid               | Haiti          | 17 June 2003      | climate & weather                   |                       | <a href="http://www.who.int/csr/don/2003_06_17a/en/">http://www.who.int/csr/don/2003_06_17a/en/</a>                     |
| Avian Influenza       | Cambodia       | 24 March 2006     | food & agriculture industry changes |                       | <a href="http://www.who.int/csr/don/2006_03_24/en/">http://www.who.int/csr/don/2006_03_24/en/</a>                       |
| Avian Influenza       | Turkey         | 05 January 2006   | food & agriculture industry changes |                       | <a href="http://www.who.int/csr/don/2006_01_18/en/">http://www.who.int/csr/don/2006_01_18/en/</a>                       |
| Streptococcus suis    | China          | 03 August 2005    | food & agriculture industry changes |                       | <a href="http://www.who.int/csr/don/2005_08_03/en/">http://www.who.int/csr/don/2005_08_03/en/</a>                       |
| Avian Influenza       | Canada         | 05 April 2004     | food & agriculture industry changes |                       | <a href="http://www.who.int/csr/don/2004_04_05/en/">http://www.who.int/csr/don/2004_04_05/en/</a>                       |
| Avian Influenza       | China          | 01 March 2007     | food & agriculture industry changes |                       | <a href="http://www.who.int/csr/don/2007_03_01a/en/">http://www.who.int/csr/don/2007_03_01a/en/</a>                     |
| Avian Influenza       | China          | 07 January 2009   | food & agriculture industry changes |                       | <a href="http://www.who.int/csr/don/2009_01_07a/en/index.html">http://www.who.int/csr/don/2009_01_07a/en/index.html</a> |
| Avian Influenza       | Egypt          | 16 December 2008  | food & agriculture industry changes |                       | <a href="http://www.who.int/csr/don/2008_12_16/en/">http://www.who.int/csr/don/2008_12_16/en/</a>                       |
| Avian Influenza       | Egypt          | 20 March 2006     | food & agriculture industry changes |                       | <a href="http://www.who.int/csr/don/2006_03_20/en/">http://www.who.int/csr/don/2006_03_20/en/</a>                       |
| Avian Influenza       | Iraq           | 30 January 2006   | food & agriculture industry changes |                       | <a href="http://www.who.int/csr/don/2006_01_30a/en/">http://www.who.int/csr/don/2006_01_30a/en/</a>                     |
| Avian Influenza       | Laos           | 27 February 2007  | food & agriculture industry changes |                       | <a href="http://www.who.int/csr/don/2007_02_27/en/">http://www.who.int/csr/don/2007_02_27/en/</a>                       |
| Avian Influenza       | Pakistan       | 15 December 2007  | food & agriculture industry changes |                       | <a href="http://www.who.int/csr/don/2007_12_15/en/">http://www.who.int/csr/don/2007_12_15/en/</a>                       |
| Avian Influenza       | Thailand       | 09 September 2004 | food & agriculture industry changes |                       | <a href="http://www.who.int/csr/don/2004_09_09/en/">http://www.who.int/csr/don/2004_09_09/en/</a>                       |
| Avian Influenza       | Thailand       | 20 October 2005   | food & agriculture industry changes |                       | <a href="http://www.who.int/csr/don/2005_10_20a/en/">http://www.who.int/csr/don/2005_10_20a/en/</a>                     |
| Avian Influenza       | Thailand       | 26 July 2006      | food & agriculture industry changes |                       | <a href="http://www.who.int/csr/don/2006_07_26/en/">http://www.who.int/csr/don/2006_07_26/en/</a>                       |
| Avian Influenza       | United Kingdom | 29 May 2007       | food & agriculture industry changes |                       | <a href="http://www.who.int/csr/don/2007_05_29/en/">http://www.who.int/csr/don/2007_05_29/en/</a>                       |
| Avian Influenza       | Vietnam        | 12 August 2004    | food & agriculture industry changes |                       | <a href="http://www.who.int/csr/don/2004_08_12/en/">http://www.who.int/csr/don/2004_08_12/en/</a>                       |
| Avian Influenza       | Vietnam        | 09 November 2005  | food & agriculture industry changes |                       | <a href="http://www.who.int/csr/don/2005_11_09/en/">http://www.who.int/csr/don/2005_11_09/en/</a>                       |
| Avian Influenza       | Vietnam        | 07 January 2009   | food & agriculture industry changes |                       | <a href="http://www.who.int/csr/don/2009_01_07/en/">http://www.who.int/csr/don/2009_01_07/en/</a>                       |
| Avian Influenza       | Vietnam        | 29 June 2007      | food & agriculture industry changes |                       | <a href="http://www.who.int/csr/don/2007_06_29/en/">http://www.who.int/csr/don/2007_06_29/en/</a>                       |
| Anthrax               | Ethiopia       | 20 June 2000      | food & agriculture industry changes |                       | <a href="http://www.who.int/csr/don/2000_07_20/en/">http://www.who.int/csr/don/2000_07_20/en/</a>                       |
| Avian Influenza       | Netherlands    | 24 April 2003     | food & agriculture industry changes |                       | <a href="http://www.who.int/csr/don/2003_04_24/en/">http://www.who.int/csr/don/2003_04_24/en/</a>                       |
| Japanese Encephalitis | Malaysia       | 22 March 1999     | food & agriculture industry changes |                       | <a href="http://www.who.int/csr/don/1999_03_22a/en/">http://www.who.int/csr/don/1999_03_22a/en/</a>                     |

| <b>Disease</b>  | <b>Country</b>           | <b>Date</b>       | <b>General Driver</b>               | <b>Driver Details</b> | <b>Link</b>                                                                                                                                                                 |
|-----------------|--------------------------|-------------------|-------------------------------------|-----------------------|-----------------------------------------------------------------------------------------------------------------------------------------------------------------------------|
| Avian Influenza | Vietnam                  | 30 December 2004  | food & agriculture industry changes |                       | <a href="http://www.who.int/csr/don/2004_12_30/en/">http://www.who.int/csr/don/2004_12_30/en/</a>                                                                           |
| Avian Influenza | Egypt                    | 27 December 2006  | food & agriculture industry changes |                       | <a href="http://www.who.int/csr/don/2006_12_27a/en/">http://www.who.int/csr/don/2006_12_27a/en/</a>                                                                         |
| Plague          | China                    | 11 August 2009    | food & agriculture industry changes |                       | <a href="http://www.who.int/csr/don/2009_08_11/en/">http://www.who.int/csr/don/2009_08_11/en/</a>                                                                           |
| Avian Influenza | Azerbaijan               | 10 March 2006     | food & agriculture industry changes |                       | <a href="http://www.who.int/csr/don/2006_03_10a/en/">http://www.who.int/csr/don/2006_03_10a/en/</a>                                                                         |
| Anthrax         | Ghana                    | 05 June 1997      | food & agriculture industry changes |                       | <a href="http://www.who.int/csr/don/1997_06_05/en/">http://www.who.int/csr/don/1997_06_05/en/</a>                                                                           |
| Meningitis      | Uganda                   | 24 January 2007   | human demographics & behavior       |                       | <a href="http://www.who.int/csr/don/2007_01_24/en/">http://www.who.int/csr/don/2007_01_24/en/</a>                                                                           |
| Yellow Fever    | d'Ivoire                 | 22 September 2005 | human demographics & behavior       |                       | <a href="http://www.who.int/csr/don/2005_09_22/en/">http://www.who.int/csr/don/2005_09_22/en/</a>                                                                           |
| Plague          | DR Congo                 | 18 February 2005  | human demographics & behavior       |                       | <a href="http://www.who.int/csr/don/2005_02_18/en/">http://www.who.int/csr/don/2005_02_18/en/</a>                                                                           |
| Leptospirosis   | France                   | 15 September 2000 | international travel & commerce     |                       | <a href="http://www.who.int/csr/don/2000_09_21/en/index.html">http://www.who.int/csr/don/2000_09_21/en/index.html</a>                                                       |
| Meningitis      | United Kingdom; Spain    | 31 May 1996       | international travel & commerce     |                       | <a href="http://www.who.int/csr/don/1996_05_31/en/">http://www.who.int/csr/don/1996_05_31/en/</a>                                                                           |
| Cholera         | South Africa             | 23 May 2003       | international travel & commerce     |                       | <a href="http://www.who.int/csr/don/2003_05_23a/en/">http://www.who.int/csr/don/2003_05_23a/en/</a>                                                                         |
| Legionnaires'   | France                   | 14 August 2003    | international travel & commerce     |                       | <a href="http://www.who.int/csr/don/2003_08_14a/en/index.html">http://www.who.int/csr/don/2003_08_14a/en/index.html</a>                                                     |
|                 | West Africa (Ghana;      |                   |                                     |                       | <a href="http://www.who.int/csr/don/2003_10_09/en/index.html">http://www.who.int/csr/don/2003_10_09/en/index.html</a>                                                       |
| Poliomyelitis   | Togo; Burkina Faso)      | 09 October 2003   | international travel & commerce     |                       |                                                                                                                                                                             |
| Dengue          | Cape Verde               | 30 October 2009   | international travel & commerce     |                       | <a href="http://www.who.int/csr/don/2009_10_30a/en/">http://www.who.int/csr/don/2009_10_30a/en/</a>                                                                         |
| Legionnaires'   | Netherlands              | 18 March 1999     | international travel & commerce     |                       | <a href="http://www.who.int/csr/don/1999_03_18b/en/">http://www.who.int/csr/don/1999_03_18b/en/</a>                                                                         |
| Poliomyelitis   | Namibia                  | 07 June 2006      | international travel & commerce     |                       | <a href="http://www.who.int/csr/don/2006_06_07/en/index.html">http://www.who.int/csr/don/2006_06_07/en/index.html</a>                                                       |
| Poliomyelitis   | Ethiopia                 | 06 September 2005 | international travel & commerce     |                       | <a href="http://www.who.int/csr/don/2005_09_06/en/">http://www.who.int/csr/don/2005_09_06/en/</a>                                                                           |
| Poliomyelitis   | Indonesia                | 06 June 2005      | international travel & commerce     |                       | <a href="http://www.who.int/csr/don/2005_06_06/en/">http://www.who.int/csr/don/2005_06_06/en/</a>                                                                           |
| Poliomyelitis   | Kenya                    | 02 March 2009     | international travel & commerce     |                       | <a href="http://www.who.int/csr/don/2009_03_02a/en/">http://www.who.int/csr/don/2009_03_02a/en/</a>                                                                         |
| Poliomyelitis   | Uganda                   | 02 March 2009     | international travel & commerce     |                       | <a href="http://www.who.int/csr/don/2009_03_02a/en/">http://www.who.int/csr/don/2009_03_02a/en/</a>                                                                         |
| Meningitis      | DR Congo                 | 02 February 2007  | international travel & commerce     |                       | <a href="http://www.who.int/csr/don/2007_02_02/en/">http://www.who.int/csr/don/2007_02_02/en/</a>                                                                           |
|                 | Saudi Arabia (global     |                   |                                     |                       | <a href="http://www.who.int/csr/resources/publications/meningitis/whocdscsrqar20021.pdf">http://www.who.int/csr/resources/publications/meningitis/whocdscsrqar20021.pdf</a> |
| Meningitis      | spread)                  | 11 April 2000     | international travel & commerce     |                       |                                                                                                                                                                             |
| Poliomyelitis   | Sudan                    | 02 March 2009     | international travel & commerce     |                       | <a href="http://www.who.int/csr/don/2009_03_02a/en/">http://www.who.int/csr/don/2009_03_02a/en/</a>                                                                         |
| Shigellosis     | Central African Republic | 05 November 2003  | international travel & commerce     |                       | <a href="http://www.who.int/csr/don/2003_11_05a/en/">http://www.who.int/csr/don/2003_11_05a/en/</a>                                                                         |
| Legionnaires'   | Belgium                  | 18 November 1999  | international travel & commerce     |                       | <a href="http://www.who.int/csr/don/1999_11_18b/en/">http://www.who.int/csr/don/1999_11_18b/en/</a>                                                                         |
| Cholera         | DR Congo                 | 20 January 1997   | war & famine                        |                       | <a href="http://www.who.int/csr/don/1997_01_20/en/index.html">http://www.who.int/csr/don/1997_01_20/en/index.html</a>                                                       |
| Legionnaires'   | Norway                   | 05 September 2001 | breakdown of public health measures | sanitation & hygiene  | <a href="http://www.who.int/csr/don/2001_09_05a/en/index.html">http://www.who.int/csr/don/2001_09_05a/en/index.html</a>                                                     |
| Enterovirus     | Greece                   | 26 April 2002     | breakdown of public health measures | sanitation & hygiene  | <a href="http://www.who.int/csr/don/2001_12_05/en/index.html">http://www.who.int/csr/don/2001_12_05/en/index.html</a>                                                       |
| Ebola           | Congo Republic           | 07 February 2003  | bushmeat                            |                       | <a href="http://www.who.int/csr/don/2003_02_07a/en/index.html">http://www.who.int/csr/don/2003_02_07a/en/index.html</a>                                                     |
| Poliomyelitis   | Angola                   | 01 July 2005      | breakdown of public health measures | immunization coverage | <a href="http://www.who.int/csr/don/2005_07_01a/en/">http://www.who.int/csr/don/2005_07_01a/en/</a>                                                                         |
| Tularemia       | Serbia                   | 17 January 2002   | food & agriculture industry changes |                       | <a href="http://www.who.int/csr/don/2002_01_17/en/index.html">http://www.who.int/csr/don/2002_01_17/en/index.html</a>                                                       |
| Hemorrhagic     | Congo Republic           | 12 June 2002      | bushmeat                            |                       | <a href="http://www.who.int/csr/don/2002_06_12e/en/index.html">http://www.who.int/csr/don/2002_06_12e/en/index.html</a>                                                     |
|                 |                          |                   |                                     |                       | <a href="http://www.who.int/csr/don/1996_04_04b/en/index.html">http://www.who.int/csr/don/1996_04_04b/en/index.html</a>                                                     |
|                 |                          |                   |                                     |                       | and                                                                                                                                                                         |
| Cholera         | DR Congo                 | 04 April 1996     | breakdown of public health measures | sanitation & hygiene  | <a href="http://www.who.int/csr/don/1996_07_05b/en/index.html">http://www.who.int/csr/don/1996_07_05b/en/index.html</a>                                                     |
| Typhoid         | Tajikistan               | 02 August 1996    | climate & weather                   |                       | <a href="http://www.who.int/csr/don/1996_08_02/en/">http://www.who.int/csr/don/1996_08_02/en/</a>                                                                           |
| Plague          | Zambia                   | 31 January 1997   | climate & weather                   |                       | <a href="http://www.who.int/csr/don/1997_01_31b/en/">http://www.who.int/csr/don/1997_01_31b/en/</a>                                                                         |
| Avian Influenza | China                    | 17 November 2005  | food & agriculture industry changes |                       | <a href="http://www.who.int/csr/don/2005_11_17/en/">http://www.who.int/csr/don/2005_11_17/en/</a>                                                                           |
|                 | (Guam; Cook Islands;     |                   |                                     |                       | <a href="http://www.who.int/csr/don/1998_06_08e/en/index.html">http://www.who.int/csr/don/1998_06_08e/en/index.html</a>                                                     |
|                 | Fiji; New Caledonia;     |                   |                                     |                       |                                                                                                                                                                             |
| Dengue          | Kiribati)                | 08 June 1998      | climate & weather                   |                       |                                                                                                                                                                             |
|                 | Latin America (Brazil;   |                   |                                     |                       | <a href="http://www.who.int/csr/don/1998_06_08e/en/index.html">http://www.who.int/csr/don/1998_06_08e/en/index.html</a>                                                     |
| Dengue          | Venezuela; Colombia)     | 08 June 1998      | climate & weather                   |                       |                                                                                                                                                                             |



| <b>Disease</b>                  | <b>Country</b>                                                                 | <b>Date</b>       | <b>General Driver</b>               | <b>Driver Details</b> | <b>Link</b>                                                                                                             |
|---------------------------------|--------------------------------------------------------------------------------|-------------------|-------------------------------------|-----------------------|-------------------------------------------------------------------------------------------------------------------------|
| Malaria                         | Jamaica                                                                        | 09 February 2007  | climate & weather                   |                       | <a href="http://www.who.int/csr/don/2007_02_09/en/index.html">http://www.who.int/csr/don/2007_02_09/en/index.html</a>   |
|                                 | Faso; Guinea; Guinea-Bissau; Liberia; Mali; Mauritania; Niger; Senegal; Benin) |                   |                                     |                       | <a href="http://www.who.int/csr/don/2005_08_26/en/index.html">http://www.who.int/csr/don/2005_08_26/en/index.html</a>   |
| Cholera                         |                                                                                | 26 August 2005    | climate & weather                   |                       |                                                                                                                         |
| Buffalo Pox                     | India                                                                          | 11 April 1996     | food & agriculture industry changes |                       | <a href="http://www.who.int/csr/don/1996_04_11/en/">http://www.who.int/csr/don/1996_04_11/en/</a>                       |
| Cholera                         | DR Congo                                                                       | 15 November 1996  | unspecified                         |                       | <a href="http://www.who.int/csr/don/1996_11_15b/en/index.html">http://www.who.int/csr/don/1996_11_15b/en/index.html</a> |
| Ebola                           | Congo Republic                                                                 | 07 November 2003  | unspecified                         |                       | <a href="http://www.who.int/csr/don/2003_11_07/en/">http://www.who.int/csr/don/2003_11_07/en/</a> and                   |
| Ebola                           | South Africa                                                                   | 18 November 1996  | medical industry changes            |                       | <a href="http://www.who.int/csr/don/1996_11_18/en/">http://www.who.int/csr/don/1996_11_18/en/</a>                       |
| Cholera                         | Cameroon                                                                       | 15 June 2004      | climate & weather                   |                       | <a href="http://www.who.int/csr/don/2004_06_15/en/">http://www.who.int/csr/don/2004_06_15/en/</a>                       |
| Cholera                         | Zambia                                                                         | 27 January 1999   | climate & weather                   |                       | <a href="http://www.who.int/csr/don/1999_01_27/en/">http://www.who.int/csr/don/1999_01_27/en/</a>                       |
| SARS                            | China                                                                          | 22 April 2004     | breakdown of public health measures | sanitation & hygiene  | <a href="http://www.who.int/csr/don/2004_04_22/en/">http://www.who.int/csr/don/2004_04_22/en/</a>                       |
| Crimean-Congo Hemorrhagic Fever | Turkey                                                                         | 08 August 2006    | breakdown of public health measures | sanitation & hygiene  | <a href="http://www.who.int/csr/don/2006_08_08b/en/">http://www.who.int/csr/don/2006_08_08b/en/</a>                     |
| Rift Valley Fever               | Mauritania                                                                     | 10 November 1998  | food & agriculture industry changes |                       | <a href="http://www.who.int/csr/don/1998_11_10/en/">http://www.who.int/csr/don/1998_11_10/en/</a>                       |
| Rift Valley Fever               | Yemen                                                                          | 26 September 2000 | food & agriculture industry changes |                       | <a href="http://www.who.int/csr/don/2000_09_26/en/">http://www.who.int/csr/don/2000_09_26/en/</a>                       |
| Crimean-Congo Hemorrhagic Fever |                                                                                |                   |                                     |                       | <a href="http://www.who.int/csr/don/1998_05_08b/en/">http://www.who.int/csr/don/1998_05_08b/en/</a>                     |
| Crimean-Congo Hemorrhagic Fever | Pakistan                                                                       | 08 May 1998       | food & agriculture industry changes |                       |                                                                                                                         |
| Crimean-Congo Hemorrhagic Fever |                                                                                |                   |                                     |                       | <a href="http://www.who.int/csr/don/1996_11_05/en/">http://www.who.int/csr/don/1996_11_05/en/</a>                       |
| Japanese Encephalitis           | South Africa                                                                   | 05 November 1996  | food & agriculture industry changes |                       | <a href="http://www.who.int/csr/don/2005_09_13a/en/">http://www.who.int/csr/don/2005_09_13a/en/</a>                     |
| Crimean-Congo Hemorrhagic Fever | India                                                                          | 13 September 2005 | breakdown of public health measures | vector control        | <a href="http://www.who.int/csr/don/1998_05_08a/en/">http://www.who.int/csr/don/1998_05_08a/en/</a>                     |
| Crimean-Congo Hemorrhagic Fever | Afghanistan                                                                    | 08 May 1998       | human susceptibility to infection   |                       |                                                                                                                         |
| Cholera                         | Malaysia                                                                       | 20 May 1996       | food & agriculture industry changes |                       | <a href="http://www.who.int/csr/don/1996_05_20/en/">http://www.who.int/csr/don/1996_05_20/en/</a>                       |
| Cholera                         | Vietnam                                                                        | 22 April 2008     | food & agriculture industry changes |                       | <a href="http://www.who.int/csr/don/2008_04_22/en/">http://www.who.int/csr/don/2008_04_22/en/</a>                       |
| Cholera                         | Guinea-Bissau                                                                  | 24 September 2008 | human susceptibility to infection   |                       | <a href="http://www.who.int/csr/don/2008_09_24/en/">http://www.who.int/csr/don/2008_09_24/en/</a>                       |
| Poliomyelitis                   | Iraq                                                                           | 24 September 1999 | breakdown of public health measures | immunization coverage | <a href="http://www.who.int/csr/don/1999_09_24/en/">http://www.who.int/csr/don/1999_09_24/en/</a>                       |
| Rift Valley Fever               | Kenya; Somalia                                                                 | 06 January 1998   | human demographics & behavior       |                       | <a href="http://www.who.int/csr/don/1998_01_06b/en/index.html">http://www.who.int/csr/don/1998_01_06b/en/index.html</a> |
| Meningitis                      | DR Congo                                                                       | 28 January 1998   | human demographics & behavior       |                       | <a href="http://www.who.int/csr/don/1998_01_28/en/">http://www.who.int/csr/don/1998_01_28/en/</a>                       |
| Cholera                         | Senegal                                                                        | 29 March 2005     | human demographics & behavior       |                       | <a href="http://www.who.int/csr/don/2005_03_29/en/">http://www.who.int/csr/don/2005_03_29/en/</a>                       |
| Cholera                         | Rwanda                                                                         | 13 December 1996  | human demographics & behavior       |                       | <a href="http://www.who.int/csr/don/1996_12_13a/en/">http://www.who.int/csr/don/1996_12_13a/en/</a>                     |
| Cholera                         | Rwanda                                                                         | 19 May 1998       | human demographics & behavior       |                       | <a href="http://www.who.int/csr/don/1998_05_19c/en/">http://www.who.int/csr/don/1998_05_19c/en/</a>                     |
| Typhus                          | Burundi                                                                        | 06 May 1997       | war & famine                        |                       | <a href="http://www.who.int/csr/don/1997_05_06c/en/">http://www.who.int/csr/don/1997_05_06c/en/</a>                     |
| Diphtheria                      | Afghanistan                                                                    | 29 August 2003    | war & famine                        |                       | <a href="http://www.who.int/csr/don/2003_08_29/en/">http://www.who.int/csr/don/2003_08_29/en/</a>                       |
| Hepatitis                       | Chad                                                                           | 19 August 2004    | war & famine                        |                       | <a href="http://www.who.int/csr/don/2004_08_19/en/">http://www.who.int/csr/don/2004_08_19/en/</a>                       |
| Leishmaniasis                   | Pakistan                                                                       | 16 January 2002   | war & famine                        |                       | <a href="http://www.who.int/csr/don/2002_01_16/en/">http://www.who.int/csr/don/2002_01_16/en/</a>                       |
| Meningitis                      | Chad                                                                           | 11 January 2005   | war & famine                        |                       | <a href="http://www.who.int/csr/don/2005_01_11a/en/index.html">http://www.who.int/csr/don/2005_01_11a/en/index.html</a> |
| Meningitis                      | Tanzania                                                                       | 23 August 2002    | war & famine                        |                       | <a href="http://www.who.int/csr/don/2002_08_23a/en/index.html">http://www.who.int/csr/don/2002_08_23a/en/index.html</a> |
| Shigellosis                     | Sudan                                                                          | 14 July 2004      | war & famine                        |                       | <a href="http://www.who.int/csr/don/2004_07_14/en/">http://www.who.int/csr/don/2004_07_14/en/</a>                       |
|                                 |                                                                                |                   |                                     |                       | <a href="http://www.who.int/bulletin/archives/78(9)1093.pdf">http://www.who.int/bulletin/archives/78(9)1093.pdf</a>     |
| Diarrheal Disease               | Bangladesh                                                                     | 30 September 1998 | breakdown of public health measures | sanitation & hygiene  |                                                                                                                         |
| E. coli                         | Canada                                                                         | 30 May 2000       | breakdown of public health measures | sanitation & hygiene  | <a href="http://www.who.int/csr/don/2000_05_30/en/">http://www.who.int/csr/don/2000_05_30/en/</a>                       |

| <b>Disease</b>                  | <b>Country</b>                    | <b>Date</b>      | <b>General Driver</b>               | <b>Driver Details</b> | <b>Link</b>                                                                                                                                             |
|---------------------------------|-----------------------------------|------------------|-------------------------------------|-----------------------|---------------------------------------------------------------------------------------------------------------------------------------------------------|
| Cholera                         | Zambia                            | 27 October 1999  | human demographics & behavior       |                       | <a href="http://www.who.int/csr/don/1999_10_27/en/">http://www.who.int/csr/don/1999_10_27/en/</a>                                                       |
| Rift Valley Fever               | Kenya                             | 26 December 2006 | human demographics & behavior       |                       | <a href="http://www.who.int/csr/don/2006_12_26/en/">http://www.who.int/csr/don/2006_12_26/en/</a>                                                       |
| Yellow Fever                    | Brazil                            | 14 January 2000  | breakdown of public health measures | vector control        | <a href="http://www.who.int/csr/don/2000_01_14/en/">http://www.who.int/csr/don/2000_01_14/en/</a>                                                       |
| Chikungunya                     | India                             | 17 October 2006  | breakdown of public health measures | vector control        | <a href="http://www.who.int/csr/don/2006_10_17/en/">http://www.who.int/csr/don/2006_10_17/en/</a>                                                       |
| Crimean-Congo Hemorrhagic Fever | Russia                            | 26 July 1999     | breakdown of public health measures | vector control        | <a href="http://www.who.int/csr/don/1999_07_26/en/">http://www.who.int/csr/don/1999_07_26/en/</a>                                                       |
| Cholera                         | Liberia                           | 26 April 1996    | war & famine                        |                       | <a href="http://www.who.int/csr/don/1996_04_26/en/">http://www.who.int/csr/don/1996_04_26/en/</a>                                                       |
| Cholera                         | Tanzania                          | 06 December 1996 | war & famine                        |                       | <a href="http://www.who.int/csr/don/1996_12_06c/en/">http://www.who.int/csr/don/1996_12_06c/en/</a>                                                     |
| Undiagnosed Hemorrhagic Fever   | Zimbabwe                          | 14 May 1999      | war & famine                        |                       | <a href="http://www.who.int/csr/don/1999_05_14/en/">http://www.who.int/csr/don/1999_05_14/en/</a>                                                       |
| Meningitis                      | Angola                            | 21 October 1999  | war & famine                        |                       | <a href="http://www.who.int/csr/don/1999_10_21/en/">http://www.who.int/csr/don/1999_10_21/en/</a>                                                       |
| Meningitis                      | DR Congo                          | 22 December 1998 | war & famine                        |                       | <a href="http://www.who.int/csr/don/1998_12_22b/en/">http://www.who.int/csr/don/1998_12_22b/en/</a>                                                     |
| Cholera                         | DR Congo                          | 15 April 1997    | unspecified                         |                       | <a href="http://www.who.int/csr/don/1997_04_15b/en/index.html">http://www.who.int/csr/don/1997_04_15b/en/index.html</a>                                 |
| Cholera                         | West Africa (Ghana; Sierra Leone) | 14 October 1998  | unspecified                         |                       | <a href="http://www.who.int/csr/don/1998_10_14/en/index.html">http://www.who.int/csr/don/1998_10_14/en/index.html</a>                                   |
| Tularemia                       | Yugoslavia                        | 21 April 2000    | unspecified                         |                       | <a href="http://www.who.int/csr/don/2000_04_21a/en/index.html">http://www.who.int/csr/don/2000_04_21a/en/index.html</a>                                 |
| Arenavirus                      | Zambia; South Africa              | 10 October 2008  | unspecified                         |                       | <a href="http://www.who.int/csr/don/2008_10_13/en/index.html">http://www.who.int/csr/don/2008_10_13/en/index.html</a>                                   |
| SARS                            | China                             | 28 December 2003 | unspecified                         |                       | <a href="http://www.who.int/csr/don/2003_12_28/en/index.html">http://www.who.int/csr/don/2003_12_28/en/index.html</a>                                   |
| Legionnaires'                   | France                            | 13 August 1998   | unspecified                         |                       | <a href="http://www.who.int/csr/don/1998_08_13/en/index.html">http://www.who.int/csr/don/1998_08_13/en/index.html</a>                                   |
| Cholera                         | Ecuador                           | 29 February 1996 | human susceptibility to infection   |                       | <a href="http://www.who.int/csr/don/1996_02_29a/en/">http://www.who.int/csr/don/1996_02_29a/en/</a>                                                     |
| Ebola                           | Gabon; Congo Republic             | 05 December 2001 | unspecified                         |                       | <a href="http://www.who.int/csr/don/2001_12_05/en/index.html">http://www.who.int/csr/don/2001_12_05/en/index.html</a>                                   |
| Yellow Fever                    | Liberia                           | 25 February 2004 | human demographics & behavior       |                       | <a href="http://www.who.int/mediacentre/news/releases/2004/pr16/en/index.html">http://www.who.int/mediacentre/news/releases/2004/pr16/en/index.html</a> |
| Undiagnosed Hemorrhagic Fever   | Gabon                             | 24 June 2002     | unspecified                         |                       | <a href="http://www.who.int/csr/don/2002_06_24e/en/index.html">http://www.who.int/csr/don/2002_06_24e/en/index.html</a>                                 |
| Crimean-Congo Hemorrhagic Fever | Yugoslavia                        | 08 June 2001     | unspecified                         |                       | <a href="http://www.who.int/csr/don/2001_06_08e/en/index.html">http://www.who.int/csr/don/2001_06_08e/en/index.html</a>                                 |
|                                 |                                   |                  |                                     |                       | and <a href="http://www.who.int/csr/don/2001_06_29e/en/index.html">http://www.who.int/csr/don/2001_06_29e/en/index.html</a>                             |
